# Supplementary material for: The Effectiveness of Physical and Chemical Defense Responses of Wild Emmer Wheat Against Aphids Depends on Leaf Position and Genotype
Source: Front Plant Sci. 2021 Jun 28;12:667820. doi: 10.3389/fpls.2021.667820 (PMC8273356; doi:10.3389/fpls.2021.667820)
Supplement: Supplementary file 2 [file Table_1.xlsx]

## Sheet: Table S1
Supplementary Table S1: Information on 203 WEW accessions used in this project. The locations sites (in Israel) of each accession are described by the name of the collecting sites, longitudes, and latitudes. The total number of aphids per plant (n =8) upon 96 h of R. padi infestation are included.
					Whole-cage aphid bioassay (96 hours)
Full accession	Accession acronym	Location	Longitude	Latitude	Rep 1	Rep 2	Rep 3	Rep 4	Rep 5	Rep 6	Rep 7	Rep 8	Average	SE
TD-1059-3	TD-1059	Katcha Farm	35.6991	32.9385	57	50	56	51	49	43	47	41	49.25	1.98881
TD-1060-4	TD-1060	Katcha Farm	35.6991	32.9385	27	32	24	29	34	32	25	30	29.125	1.25978
TD-1142-1	TD-1142	Irit (Tubas)	35.3689	32.3204	42	48	50	55	57	51	56	49	51	1.75255
TD-1146-3	TD-1146	Nahal Zviya	35.4356	32.4727	31	37	39	41	33	36	38	43	37.25	1.39834
TD-1148-5	TD-1148	Nahal Zviya	35.4356	32.4727	26	45	36	39	29	37	33	38	35.375	2.11236
TD-1161-2	TD-1161	Arbel	35.4965	32.8219	40	33	45	51	43	41	39	37	41.125	1.91272
TD-1162-3	TD-1162	Arbel	35.4965	32.8219	48	55	61	53	43	49	57	54	52.5	2
TD-1163-4	TD-1163	Arbel	35.4965	32.8219	23	27	17	20	13	27	21	24	21.5	1.71131
TD-1178-1	TD-1178	Hoze Shomron	35.2576	32.116	77	79	63	71	75	69	65	75	71.75	2.03321
TD-1182-1	TD-1182	Amirim	35.4553	32.9392	66	72	65	61	70	66	59	69	66	1.55839
TD-1194-6	TD-1194	Zikhron Ya'aqov	34.9509	32.5594	14	24	20	19	17	22	26	20	20.25	1.34629
TD-1197-9	TD-1197	Zikhron Ya'aqov	34.9509	32.5594	33	29	24	22	25	28	21	30	26.5	1.476
TD-1204-0	TD-1204	Sifsufa	35.4402	33.0131	33	32	29	31	35	37	34	30	32.625	0.943729
TD-1211-5	TD-1211	Gilboa	35.3885	32.5165	35	27	32	31	26	33	31	29	30.5	1.06904
TD-1220-2	TD-1220	Ma'ale Gilboa	35.4141	32.4798	55	59	52	63	60	55	50	61	56.875	1.6195
TD-1223-5	TD-1223	Ma'ale Gilboa	35.4141	32.4798	30	33	34	35	32	30	36	31	32.625	0.800391
TD-1224-6	TD-1224	Ma'ale Gilboa	35.4141	32.4798	34	38	40	37	45	41	35	37	38.375	1.25268
TD-1268-25	TD-1268	Har Dov	35.7198	33.3013	19	15	13	17	18	14	16	20	16.5	0.866025
TD-1320-11	TD-1320	Majdal Shams	35.7717	33.2678	13	21	17	18	21	20	23	22	19.375	1.14856
TD-1405-45	TD-1405	Elqana	35.0308	32.1083	61	65	67	71	69	75	77	78	70.375	2.1292
TD-1478-4	TD-1478	Hoze Shomron Junct.	35.2576	32.116	18	15	23	21	19	15	19	17	18.375	0.980843
TD-1511-21	TD-1511	Kokhav HaShachar	35.3509	31.9594	15	13	18	16	24	14	19	16	16.875	1.23111
TD-1536-46	TD-1536	Kokhav HaShachar	35.3509	31.9594	18	14	19	13	11	17	12	12	14.5	1.08562
TD-169-47	TD-169	Ammi'ad	35.5291	32.9302	33	30	27	35	37	41	26	29	32.25	1.83955
TD-1736-12	TD-1736	Yesha Junc.	35.5547	33.1138	19	21	20	18	16	19	22	21	19.5	0.681385
TD-1745-21	TD-1745	Yesha Junc.	35.5547	33.1138	21	26	22	35	17	31	27	23	25.25	2.04197
TD-1756-2	TD-1756	Ramot Naftali	35.5576	33.104	26	31	35	27	35	32	34	38	32.25	1.4608
TD-1762-8	TD-1762	Ramot Naftali	35.5576	33.104	37	27	31	18	24	26	36	33	29	2.28348
TD-1828-31	TD-1828	Ramot Naftali	35.5576	33.104	29	30	29	38	32	34	36	31	32.375	1.17925
TD-1830-33	TD-1830	Ramot Naftali	35.5576	33.104	34	21	39	29	22	32	31	25	29.125	2.18303
TD-1839-8	TD-1839	Ma'ale Merav	35.4391	32.4361	15	19	23	28	22	14	15	11	18.375	1.99944
TD-1855-24	TD-1855	Ma'ale Merav	35.4391	32.4361	16	13	16	12	12	12	15	14	13.75	0.61962
TD-1865-34	TD-1865	Ma'ale Merav	35.4391	32.4361	17	15	13	16	12	14	12	17	14.5	0.731925
TD-1888-3	TD-1888	Emeq Ha'Arazim	35.1726	31.8035	11	9	13	17	12	22	18	13	14.375	1.51112
TD-1898-8	TD-1898	Avne Hefez	35.0774	32.2837	21	23	27	29	31	20	27	29	25.875	1.43225
TD-1930-1	TD-1930	Natur	35.7589	32.8535	27	34	25	30	35	26	29	33	29.875	1.34214
TD-1934-3	TD-1934	Yonatan	35.7969	32.9423	25	27	34	26	23	30	31	33	28.625	1.40073
TD-1938-0	TD-1938	Yeriho	35.4606	31.857	38	33	35	27	30	29	34	31	32.125	1.25978
TD-1939-0	TD-1939	Har Gerizim	35.2731	32.2008	11	14	19	21	24	28	27	30	21.75	2.40349
TD-1970-20	TD-1970	Kursi- Giv'at Yoav	35.6741	32.813	15	9	14	17	19	16	12	22	15.5	1.42678
TD-1985-8	TD-1985	Mizpe Ofir	35.6637	32.8131	24	25	22	33	28	23	22	22	24.875	1.36849
TD-2001-2	TD-2001	Hayarmuk	35.6434	32.6788	32	24	39	33	35	43	31	37	34.25	2.0244
TD-2006-7	TD-2006	Hayarmuk	35.6434	32.6788	38	34	39	29	25	32	25	27	31.125	1.95884
TD-2027-1	TD-2027	Mezar	35.7364	32.7686	21	29	21	28	27	21	29	22	24.75	1.34629
TD-2044-14	TD-2044	Gamla	35.7518	32.9045	21	29	17	22	13	23	19	21	20.625	1.64683
TD-2048-18	TD-2048	Gamla	35.7518	32.9045	9	20	15	9	13	7	8	11	11.5	1.5353
TD-2056-26	TD-2056	Gamla	35.7518	32.9045	9	7	8	7	8	14	15	12	10	1.13389
TD-2057-27	TD-2057	Gamla	35.7518	32.9045	14	17	9	12	11	19	18	22	15.25	1.57831
TD-2059-29	TD-2059	Gamla	35.7518	32.9045	21	24	19	23	17	26	17	20	20.875	1.15631
TD-2062-32	TD-2062	Gamla	35.7518	32.9045	30	19	21	27	22	29	25	23	24.5	1.38873
TD-2070-1	TD-2070	Mizpor Negev Kinrot	35.6454	32.7012	33	39	37	29	31	34	42	37	35.25	1.52069
TD-21-21	TD-21	Gonen	35.6494	33.121	31	28	24	23	20	28	26	34	26.75	1.58959
TD-2123-53	TD-2123	Avne Hefez	35.0774	32.2837	49	37	43	41	56	47	52	55	47.5	2.40535
TD-2155-30	TD-2155	Einav Road	35.1283	32.282	17	19	23	16	21	18	25	20	19.875	1.07633
TD-2172-1	TD-2172	Einav	35.1252	32.2836	22	20	25	14	18	21	26	19	20.625	1.36195
TD-2182-7	TD-2182	Kefar Qasim	34.9821	32.1053	24	27	19	21	19	15	21	18	20.5	1.30931
TD-2193-18	TD-2193	Kefar Qasim	34.9821	32.1053	19	21	29	17	22	25	20	22	21.875	1.31526
TD-2209-2	TD-2209	Majdel Bani-Fadil	35.3677	32.0888	29	31	38	40	43	37	34	40	36.5	1.70084
TD-2212-5	TD-2212	Majdel Bani-Fadil	35.3677	32.0888	65	54	50	55	59	49	54	57	55.375	1.80216
TD-2218-11	TD-2218	Majdel Bani-Fadil	35.3677	32.0888	40	43	39	32	42	33	39	34	37.75	1.48504
TD-2220-13	TD-2220	Majdel Bani-Fadil	35.3677	32.0888	35	37	41	44	31	36	39	45	38.5	1.66905
TD-2223-16	TD-2223	Majdel Bani-Fadil	35.3677	32.0888	33	40	31	35	45	39	30	32	35.625	1.85104
TD-2238-15	TD-2238	Gitit	35.387	32.1035	56	61	44	49	53	51	39	48	50.125	2.42338
TD-2262-39	TD-2262	Gitit	35.387	32.1035	33	45	39	31	49	40	38	42	39.625	2.08684
TD-2265-2	TD-2265	Kokhav HaShachar	35.3509	31.9594	39	28	27	36	41	34	29	38	34	1.90863
TD-2279-2	TD-2279	Kokhav HaShachar	35.3509	31.9594	37	29	43	38	33	26	39	36	35.125	1.95884
TD-2295-5	TD-2295	Ma'ale Efrayim	35.4039	32.0713	35	33	44	46	30	39	43	37	38.375	1.99944
TD-2300-3	TD-2300	Gitit	35.387	32.1035	32	14	16	23	29	26	24	17	22.625	2.28299
TD-2315-15	TD-2315	Betar Ilit	35.12	31.6998	42	39	46	42	48	51	37	44	43.625	1.63595
TD-2318-18	TD-2318	Betar Ilit	35.12	31.6998	47	49	50	46	41	39	44	47	45.375	1.34878
TD-2345-2	TD-2345	Ya'afuri valley	35.7645	33.2438	31	45	39	34	29	40	27	34	34.875	2.15006
TD-2351-8	TD-2351	Ya'afuri valley	35.7645	33.2438	62	52	55	59	65	59	66	53	58.875	1.86545
TD-2390-4	TD-2390	Merav	35.4391	32.4361	69	79	76	75	71	70	68	81	73.625	1.71065
TD-2408-18	TD-2408	Jerusalem	35.2137	31.7683	40	35	32	39	31	50	36	38	37.625	2.09538
TD-2419-1	TD-2419	Nahal Ktalav	35.0767	31.7339	34	37	39	40	42	32	35	47	38.25	1.7087
TD-2452-34	TD-2452	Sha'ar HaGay	35.0252	31.8156	31	49	45	39	45	32	37	35	39.125	2.33328
TD-2475-6	TD-2475	Keren Bratot	35.2355	33.0463	40	45	44	47	49	39	43	40	43.375	1.26685
TD-2478-1	TD-2478	Elon More	35.3312	32.2349	38	25	41	34	39	36	42	39	36.75	1.90629
TD-2536-39	TD-2536	Elon More	35.3312	32.2349	28	25	33	30	31	27	29	24	28.375	1.068
TD-2585-9	TD-2585	Sha'ar HaGay	35.0252	31.8156	33	46	38	28	33	42	39	32	36.375	2.09538
TD-2587-11	TD-2587	Sha'ar HaGay	35.0252	31.8156	34	51	39	35	45	46	43	34	40.875	2.24752
TD-2619-8	TD-2619	Bet Arye	35.053	32.0388	25	24	34	23	29	33	39	37	30.5	2.17124
TD-2650-39	TD-2650	Bet Arye	35.053	32.0388	47	43	51	55	59	47	45	50	49.625	1.87976
TD-2665-4	TD-2665	Hadom HaShomron	34.9774	32.0361	41	47	44	39	44	51	49	50	45.625	1.53457
TD-2667-6	TD-2667	Hadom HaShomron	34.9774	32.0361	46	41	35	33	39	45	47	40	40.75	1.8003
TD-2671-10	TD-2671	Hadom HaShomron	34.9774	32.0361	36	31	49	41	27	39	37	35	36.875	2.33328
TD-2672-1	TD-2672	Pedu'el	35.0523	32.0624	53	55	57	61	67	58	48	59	57.25	1.98881
TD-2714-1	TD-2714	Ale Zahav	35.0644	32.0722	51	56	47	59	41	43	49	44	48.75	2.24205
TD-2723-2	TD-2723	Kanaf	35.6979	32.8704	38	36	39	47	42	31	32	28	36.625	2.20339
TD-2789-13	TD-2789	Tel Aristobolya	34.9983	31.4474	55	65	51	57	53	48	44	57	53.75	2.25792
TD-2800-24	TD-2800	Tel Aristobolya	34.9983	31.4474	22	32	35	39	33	37	41	27	33.25	2.22606
TD-2839-1	TD-2839	Nahal Hilazon	35.2613	32.8751	43	49	55	59	61	63	58	60	56	2.39792
TD-2841-3	TD-2841	Nahal Hilazon	35.2613	32.8751	39	27	23	31	19	32	37	30	29.75	2.36605
TD-2842-4	TD-2842	Nahal Hilazon	35.2613	32.8751	45	47	39	37	41	49	46	43	43.375	1.46309
TD-285-49	TD-285	Almagor	35.6003	32.903	23	24	29	31	30	22	26	28	26.625	1.19429
TD-2850-8	TD-2850	Zurit	35.2507	32.9009	41	33	31	39	37	43	45	49	39.75	2.136
TD-2851-9	TD-2851	Zurit	35.2507	32.9009	36	48	33	45	49	41	42	47	42.625	2.04361
TD-2856-5	TD-2856	Ahihud east	35.1718	32.9073	22	28	20	24	27	29	32	19	25.125	1.63049
TD-2858-7	TD-2858	Ahihud east	35.1718	32.9073	56	58	61	65	67	50	55	51	57.875	2.17484
TD-2875-32	TD-2875	Har Amasa	35.111	31.3513	64	67	63	60	71	58	61	57	62.625	1.65764
TD-2912-34	TD-2912	Hermon	35.7639	33.2939	31	41	36	33	34	39	42	37	36.625	1.375
TD-2937-2	TD-2937	Yonatan	35.7969	32.9423	46	43	47	42	39	40	45	42	43	1
TD-2940-5	TD-2940	Yonatan	35.7969	32.9423	38	46	43	38	43	49	42	35	41.75	1.62294
TD-2950-5	TD-2950	Ramat HaNadiv	34.9441	32.5506	21	24	19	23	22	25	27	29	23.75	1.14564
TD-2953-2	TD-2953	Qazir	35.0967	32.4847	26	28	33	27	23	28	19	21	25.625	1.58043
TD-2969-9	TD-2969	Mizpe Monfort	35.2216	33.0478	54	53	51	59	41	57	49	47	51.375	2.03485
TD-2971-56	TD-2971	Hermon	35.7639	33.2939	32	36	48	42	48	38	40	41	40.625	1.95428
TD-2976-5	TD-2976	Modi'in	35.0451	31.9264	51	43	41	49	39	37	35	42	42.125	1.95884
TD-2984-4	TD-2984	Shilat	35.0122	31.9197	21	23	19	26	24	27	33	31	25.5	1.69031
TD-2985-5	TD-2985	Shilat	35.0122	31.9197	23	21	25	27	29	30	33	35	27.875	1.70543
TD-2986-6	TD-2986	Shilat	35.0122	31.9197	32	36	49	44	47	42	38	40	41	2.00891
TD-2991-1	TD-2991	Modi'in	35.0103	31.8895	31	29	35	39	41	37	36	32	35	1.4516
TD-3001-1	TD-3001	Modi'in	35.0103	31.8895	33	32	37	28	36	29	31	34	32.5	1.11803
TD-3018-4	TD-3018	Modi'in	35.0103	31.8895	19	21	20	26	27	24	29	31	24.625	1.54616
TD-3040-1	TD-3040	Shilat	35.0176	31.923	28	25	23	28	26	30	32	22	26.75	1.20638
TD-3046-4	TD-3046	Ein Tut	35.066	32.6268	24	21	19	23	22	26	19	17	21.375	1.05115
TD-3049-7	TD-3049	Ein Tut	35.066	32.6268	16	23	21	15	17	16	20	23	18.875	1.15631
TD-3056-6	TD-3056	Daliyya	35.0727	32.5751	36	32	37	39	41	45	48	46	40.5	1.95485
TD-3062-6	TD-3062	Golani Junction 1	35.4078	32.7706	52	49	53	57	59	48	50	51	52.375	1.36195
TD-3064-8	TD-3064	Golani Junction 1	35.4078	32.7706	45	43	51	58	62	52	49	52	51.5	2.21198
TD-3067-11	TD-3067	Golani Junction 1	35.4078	32.7706	35	39	36	33	41	29	37	25	34.375	1.86066
TD-3068-1	TD-3068	Golani Junction 2	35.4052	32.7708	21	29	25	37	28	33	36	31	30	1.91796
TD-3070-1	TD-3070	Sede Ilan	35.4239	32.7423	18	21	23	25	27	29	31	30	25.5	1.62569
TD-3071-2	TD-3071	Sede Ilan	35.4239	32.7423	29	31	33	34	41	39	42	45	36.75	2.04197
TD-3078-9	TD-3078	Sede ilan	35.4239	32.7423	11	19	17	14	18	20	21	15	16.875	1.18679
TD-3080-1	TD-3080	Ela'd	34.96	32.0453	48	52	55	57	59	62	65	66	58	2.22004
TD-3097-2	TD-3097	Har Amasa near vineyard	35.1049	31.3512	19	35	32	26	38	31	27	29	29.625	2.06966
TD-3098-0	TD-3098	Yehudiyya forest	35.6819	32.9257	13	15	18	16	20	17	23	21	17.875	1.17165
TD-3101-3	TD-3101	Mt. Oren	34.9944	32.7188	28	29	31	37	35	33	30	39	32.75	1.39834
TD-3106-8	TD-3106	Mt. Oren	34.9944	32.7188	55	46	51	42	45	49	55	61	50.5	2.22004
TD-3109-2	TD-3109	Majd-el Krum	35.2589	32.9262	34	45	49	51	48	52	56	43	47.25	2.37359
TD-3115-7	TD-3115	Revaya basalt	35.4618	32.4501	19	30	22	20	28	26	24	27	24.5	1.38873
TD-3117-9	TD-3117	Revaya basalt	35.4618	32.4501	17	21	25	27	30	24	22	28	24.25	1.48504
TD-3120-1	TD-3120	Giv'at Ada	35.0097	32.5118	22	18	32	29	33	27	21	29	26.375	1.92667
TD-3123-3	TD-3123	Ramot menashe	35.0571	32.5967	20	28	23	27	23	19	21	24	23.125	1.125
TD-3147-7	TD-3147	Kerem Maharal	35.0044	32.6541	55	45	46	49	51	55	57	48	50.75	1.58959
TD-3150-1	TD-3150	Beit-Itab	35.0573	31.7324	49	42	38	41	46	51	53	46	45.75	1.82981
TD-3156-1	TD-3156	Bar Giyyora	35.0721	31.7274	54	55	49	38	45	49	52	58	50	2.23607
TD-3159-4	TD-3159	Bar Giyyora	35.0721	31.7274	47	42	47	49	51	55	48	52	48.875	1.38148
TD-3162-2	TD-3162	Horbat Hannot	35.0344	31.7099	41	39	46	48	44	53	35	45	43.875	1.96793
TD-3164-4	TD-3164	Horbat Hannot	35.0344	31.7099	36	32	42	34	38	40	42	35	37.375	1.32203
TD-3165-5	TD-3165	Horbat Hannot	35.0344	31.7099	32	49	39	38	27	32	41	37	36.875	2.37124
TD-3167-2	TD-3167	Nirit	34.9789	32.1438	26	21	27	28	18	23	26	22	23.875	1.21652
TD-3169-2	TD-3169	Zviya	35.3299	32.8871	44	49	51	47	54	41	57	52	49.375	1.86066
TD-3171-4	TD-3171	Zviya	35.3299	32.8871	61	57	66	51	54	69	59	63	60	2.12972
TD-3173-6	TD-3173	Zviya	35.3299	32.8871	49	43	36	39	42	45	37	40	41.375	1.52289
TD-3174-7	TD-3174	Zviya	35.3299	32.8871	36	38	42	47	49	51	40	43	43.25	1.88746
TD-3175-8	TD-3175	Zviya	35.3299	32.8871	43	41	38	46	34	48	46	37	41.625	1.76208
TD-3178-3	TD-3178	Mizpor Bet Zayda	35.7	32.8844	39	45	47	49	41	40	42	36	42.375	1.53457
TD-32-32	TD-32	Gonen	35.6494	33.121	26	29	31	42	38	36	39	40	35.125	2.03924
TD-374-75	TD-374	Yehudiyya forest	35.6819	32.9257	32	35	39	33	42	37	34	40	36.5	1.26773
TD-393-9	TD-393	Bet Qeshet	35.4094	32.722	36	39	41	47	44	49	51	42	43.625	1.81204
TD-421-1	TD-421	Katzerin	35.6945	32.9945	29	32	41	38	39	36	34	36	35.625	1.375
TD-422-1	TD-422	Rosh Pinna	35.5329	32.9671	42	45	38	35	33	39	40	43	39.375	1.426
TD-423-1	TD-423	Upper Golan	0	0	52	56	69	66	63	67	62	59	61.75	2.0507
TD-426-3	TD-426	Nahal Orevim	35.6879	33.1442	29	31	34	33	36	32	38	40	34.125	1.30161
TD-434-11	TD-434	Nahal orevim	35.6879	33.1442	25	38	35	27	29	31	35	32	31.5	1.55839
TD-442-19	TD-442	Deir saras	35.6833	33.0463	32	36	30	34	39	42	35	43	36.375	1.63595
TD-444-21	TD-444	Galabina	35.6423	33.0354	34	36	33	31	25	35	27	29	31.25	1.39834
TD-496-73	TD-496	Nahal Orevim	35.6879	33.1442	44	41	39	37	33	37	35	42	38.5	1.30931
TD-527-40	TD-527	Har Osher	35.5527	32.882	42	30	38	40	36	38	37	31	36.5	1.46385
TD-528-109	TD-528	Central Golan	NA	NA	31	33	35	29	32	37	27	26	31.25	1.34629
TD-529-305	TD-529	Ein Zetim	35.4855	32.9961	26	28	33	30	32	29	33	34	30.625	0.998883
TD-530-323	TD-530	Majdel Ma'ar	35.4605	32.8616	29	21	24	32	26	30	32	25	27.375	1.41342
TD-531-382	TD-531	Hula Reserve	35.6034	33.0699	22	23	25	30	27	29	31	24	26.375	1.19429
TD-54-54	TD-54	Gonen	35.6494	33.121	34	37	49	41	44	39	42	38	40.5	1.63663
TD-590-59	TD-590	Giv'at HaMore	35.3419	32.6185	32	30	31	25	29	27	29	26	28.625	0.864736
TD-62-2	TD-62	Zefat	35.5279	32.9537	21	23	36	26	20	29	35	24	26.75	2.15266
TD-624-33	TD-624	Giv'at HaMore	35.3419	32.6185	30	25	26	23	28	31	34	36	29.125	1.58607
TD-656-15	TD-656	Kefar Shammay	35.4579	32.9557	27	29	23	24	33	35	39	30	30	1.93649
TD-663-22	TD-663	Kefar Shammay	35.4579	32.9557	16	21	29	24	19	23	20	25	22.125	1.41973
TD-671-0	TD-671	Jerusalem - Zoo	35.2137	31.7683	16	14	13	11	19	21	18	22	16.75	1.38551
TD-680-1	TD-680	Emeq Ma'an	35.7538	33.2919	25	23	27	17	16	24	29	27	23.5	1.66905
TD-682-3	TD-682	Emeq Ma'an	35.7538	33.2919	20	13	15	14	19	21	18	17	17.125	1.02535
TD-685-0	TD-685	Dov Mt.	35.7164	33.302	15	21	24	18	22	26	16	19	20.125	1.35538
TD-687-1	TD-687	Gilboa	35.3885	32.5165	36	42	43	37	39	42	44	47	41.25	1.30589
TD-690-4	TD-690	Gilboa	35.3885	32.5165	23	14	17	22	20	27	24	23	21.25	1.4608
TD-695-5	TD-695	Monfort	35.2355	33.0463	27	28	30	33	25	29	31	23	28.25	1.14564
TD-697-0	TD-697	Allon Rd.	NA	NA	45	41	39	47	50	53	55	51	47.625	2.00835
TD-698-1	TD-698	Kefar Shammay	35.4579	32.9557	52	54	48	44	46	41	42	45	46.5	1.62569
TD-701-10	TD-701	Kefar Kuk	35.893	33.5324	31	29	32	30	26	35	38	27	31	1.41421
TD-709-6	TD-709	Kefar Kuk	35.893	33.5324	42	43	49	50	52	48	46	53	47.875	1.40709
TD-728-13	TD-728	Bet Qeshet	35.4094	32.722	56	58	61	63	65	59	66	64	61.5	1.26773
TD-747-32	TD-747	Bet Qeshet	35.4094	32.722	59	64	57	55	58	56	62	68	59.875	1.57477
TD-761-14	TD-761	Nahal Dishon	35.5152	33.0538	51	54	53	45	49	52	56	47	50.875	1.30161
TD-763-16	TD-763	Nahal Dishon	35.5152	33.0538	44	46	51	53	55	48	50	52	49.875	1.30161
TD-782-6	TD-782	Rosh Pinna	35.5329	32.9671	28	22	26	37	34	32	34	29	30.25	1.73977
TD-805-14	TD-805	Dishon	35.517	33.0831	37	29	43	31	36	35	30	32	34.125	1.63049
TD-806-15	TD-806	Dishon	35.517	33.0831	25	28	31	33	35	26	30	32	30	1.22474
TD-810-19	TD-810	Dishon	35.517	33.0831	34	31	30	26	27	32	34	37	31.375	1.30845
TD-889-0	TD-889	Bet Me'ir	35.0367	31.7948	32	36	41	39	40	45	36	34	37.875	1.48128
TD-890-0	TD-890	Tabhaa	35.5421	32.8717	34	28	37	39	33	46	38	35	36.25	1.84923
TD-891-0	TD-891	Har Gerizim	35.2731	32.2008	32	34	39	31	37	40	38	29	35	1.43925
TD-893-0	TD-893	Taibe	35.2982	31.957	27	33	30	41	32	38	40	42	35.375	1.9815
TD-894-0	TD-894	Nahf	35.3267	32.9369	36	38	28	30	31	34	37	36	33.75	1.29215
TD-895-0	TD-895	Jab'a	35.077	31.6745	28	32	35	37	27	30	33	34	32	1.22474
TD-898-0	TD-898	Azmon	35.2654	32.8235	30	29	33	35	28	31	34	32	31.5	0.866025
TD-903-0	TD-903	Bat Shelomo	35.0346	32.6048	56	62	64	66	59	68	63	65	62.875	1.36849
TD-909-0	TD-909	Giv'at Koah	34.9579	32.0378	24	22	26	34	26	29	25	30	27	1.3496
TD-92-32	TD-92	Zefat	35.5279	32.9537	32	36	33	38	31	39	34	29	34	1.22474
TD-965-54	TD-965	Ramot	35.1942	31.819	38	40	42	41	37	39	32	33	37.75	1.27825
TD-975-3	TD-975	Yiftah Junction	35.549	33.1211	37	33	44	42	46	40	36	41	39.875	1.52874
TD-979-7	TD-979	Yiftah Junction	35.549	33.1211	38	46	40	37	36	34	42	44	39.625	1.46309
durum wheat (Triticum turgidum ssp.durum)	Svevo		#N/A	#N/A	41	35	33	36	39	38	32	30	35.5	1.32288
